# Supplementary material for: Elevational Patterns of Tree Species Richness and Forest Biomass on Two Subtropical Mountains in China
Source: MDPI journal article supplement (doi:10.3390/f14071337), 2023-06-29
Supplement: s1 [file s1]

## Supplementary Material

# Elevational Patterns of Tree Species Richness and Forest Biomass on Two Subtropical Mountains in China

Qiong Cai <sup>1</sup>, Suhui Ma <sup>1,2</sup>, Lijuan Sun <sup>3</sup>, Guoping Chen <sup>4</sup>, Jian Xiao <sup>1</sup>, Wenjing Fang <sup>2</sup>,  
Chengjun Ji <sup>1,\*</sup>, Zhiyao Tang <sup>1</sup> and Jingyun Fang <sup>1</sup>

<sup>1</sup> Key Laboratory for Earth Surface Processes of the Ministry of Education, Institute of Ecology, College of Urban and Environmental Sciences, Peking University, Beijing 100871, China

<sup>2</sup> School of Ecology and Environmental Science, Yunnan University, Kunming 650500, China

<sup>3</sup> State Key Laboratory of Grassland Agro-Ecosystems, College of Pastoral Agricultural Science and Technology, Lanzhou University, Lanzhou 730030, China

<sup>4</sup> State Key Laboratory of Vegetation and Environmental Change, Institute of Botany, Chinese Academy of Sciences, Beijing 100093, China

\* Correspondence: jicj@pku.edu.cn

**Table S1** Mycorrhizal types of the tree species on Mt. Wuyishan and Mt. Gonggashan. Abbreviations: AM, arbuscular mycorrhizae; EcM, ectomycorrhizae; ErM, ericoid mycorrhizae

| Species                     | Family        | Genus       | Mycorrhizal type |
|-----------------------------|---------------|-------------|------------------|
| <i>Abies fabri</i>          | Pinaceae      | Abies       | EcM              |
| <i>Acer amplum</i>          | Aceraceae     | Acer        | AM               |
| <i>Acer buergerianum</i>    | Aceraceae     | Acer        | AM               |
| <i>Acer cappadocicum</i>    | Aceraceae     | Acer        | AM               |
| <i>Acer davidii</i>         | Aceraceae     | Acer        | AM               |
| <i>Acer forrestii</i>       | Aceraceae     | Acer        | AM               |
| <i>Acer laxiflorum</i>      | Aceraceae     | Acer        | AM               |
| <i>Acer macrophyllum</i>    | Aceraceae     | Acer        | AM               |
| <i>Acer oliverianum</i>     | Aceraceae     | Acer        | AM               |
| <i>Acer pectinatum</i>      | Aceraceae     | Acer        | AM               |
| <i>Acer pubinerve</i>       | Aceraceae     | Acer        | AM               |
| <i>Acer cappadocicum</i>    | Aceraceae     | Acer        | AM               |
| <i>Acer caudatum</i>        | Aceraceae     | Acer        | AM               |
| <i>Acer tataricum</i>       | Aceraceae     | Acer        | AM               |
| <i>Acer</i> sp.             | Aceraceae     | Acer        | AM               |
| <i>Acer</i> sp1             | Aceraceae     | Acer        | AM               |
| <i>Acer</i> sp2             | Aceraceae     | Acer        | AM               |
| <i>Alangium chinense</i>    | Alangiaceae   | Alangium    | AM               |
| <i>Aleurites montana</i>    | Euphorbiaceae | Aleurites   | AM               |
| <i>Alniphyllum fortunei</i> | Styracaceae   | Alniphyllum | AM               |
| <i>Alnus nepalensis</i>     | Betulaceae    | Alnus       | AM               |

|                                   |                |                 |     |
|-----------------------------------|----------------|-----------------|-----|
| <i>Altingia gracilipes</i>        | Hamamelidaceae | Altingia        | AM  |
| <i>Aralia chinensis</i>           | Araliaceae     | Aralia          | AM  |
| <i>Berberis</i> sp.               | Berberidaceae  | Berberis        | AM  |
| <i>Berberis</i> sp1               | Berberidaceae  | Berberis        | AM  |
| <i>Berberis sieboldii</i>         | Berberidaceae  | Berberis        | AM  |
| <i>Betula</i> sp.                 | Betulaceae     | Betula          | EcM |
| <i>Betula</i> sp1                 | Betulaceae     | Betula          | EcM |
| <i>Betula</i> sp2                 | Betulaceae     | Betula          | EcM |
| <i>Betula luminifera</i>          | Betulaceae     | Betula          | EcM |
| <i>Betula utilis</i>              | Betulaceae     | Betula          | EcM |
| <i>Camellia</i> sp.               | Theaceae       | Camellia        | AM  |
| <i>Camellia chekiangoleosa</i>    | Theaceae       | Camellia        | AM  |
| <i>Camellia cuspidata</i>         | Theaceae       | Camellia        | AM  |
| <i>Camellia japonica</i>          | Theaceae       | Camellia        | AM  |
| <i>Carpinus londoniana</i>        | Betulaceae     | Carpinus        | EcM |
| <i>Castanopsis eyrei</i>          | Fagaceae       | Castanopsis     | EcM |
| <i>Castanopsis faberi</i>         | Fagaceae       | Castanopsis     | EcM |
| <i>Castanopsis fargesii</i>       | Fagaceae       | Castanopsis     | EcM |
| <i>Castanopsis megaphylla</i>     | Fagaceae       | Castanopsis     | EcM |
| <i>Castanopsis orthacantha</i>    | Fagaceae       | Castanopsis     | EcM |
| <i>Castanopsis sclerophylla</i>   | Fagaceae       | Castanopsis     | EcM |
| <i>Celastrus orbiculatus</i>      | Celastraceae   | Celastrus       | AM  |
| <i>Cerasus</i> sp.                | Rosaceae       | Cerasus         | AM  |
| <i>Cerasus</i> sp1                | Rosaceae       | Cerasus         | AM  |
| <i>Cerasus dielsiana</i>          | Rosaceae       | Cerasus         | AM  |
| <i>Cerasus schneideriana</i>      | Rosaceae       | Cerasus         | AM  |
| <i>Cerasus serrulata</i>          | Rosaceae       | Cerasus         | AM  |
| <i>Choerospondias axillaris</i>   | Anacardiaceae  | Choerospondias  | AM  |
| <i>Cinnamomum</i> sp.             | Lauraceae      | Cinnamomum      | AM  |
| <i>Cinnamomum</i> sp1             | Lauraceae      | Cinnamomum      | AM  |
| <i>Cinnamomum</i> sp2             | Lauraceae      | Cinnamomum      | AM  |
| <i>Cinnamomum camphora</i>        | Lauraceae      | Cinnamomum      | AM  |
| <i>Clematoclethra lasioclada</i>  | Actinidiaceae  | Clematoclethra  | AM  |
| <i>Clethra delavayi</i>           | Clethraceae    | Clethra         | AM  |
| <i>Cleyera</i> sp.                | Theaceae       | Cleyera         | AM  |
| <i>Cleyera</i> sp1                | Theaceae       | Cleyera         | AM  |
| <i>Cornus kousa</i>               | Cornaceae      | Cornus          | AM  |
| <i>Corylus ferox</i>              | Betulaceae     | Corylus         | EcM |
| <i>Corylus heterophylla</i>       | Betulaceae     | Corylus         | EcM |
| <i>Cotoneaster</i> sp.            | Rosaceae       | Cotoneaster     | AM  |
| <i>Cunninghamia lanceolata</i>    | Taxodiaceae    | Cunninghamia    | AM  |
| <i>Cyclobalanopsis</i> sp.        | Fagaceae       | Cyclobalanopsis | EcM |
| <i>Cyclobalanopsis augustinii</i> | Fagaceae       | Cyclobalanopsis | EcM |
| <i>Cyclobalanopsis glauca</i>     | Fagaceae       | Cyclobalanopsis | EcM |

|                                     |                  |                 |     |
|-------------------------------------|------------------|-----------------|-----|
| <i>Cyclobalanopsis jenseniana</i>   | Fagaceae         | Cyclobalanopsis | EcM |
| <i>Cyclobalanopsis multinervis</i>  | Fagaceae         | Cyclobalanopsis | EcM |
| <i>Cyclobalanopsis myrsinifolia</i> | Fagaceae         | Cyclobalanopsis | EcM |
| <i>Cyclobalanopsis pachyloma</i>    | Fagaceae         | Cyclobalanopsis | EcM |
| <i>Dalbergia hupeana</i>            | Leguminosae      | Dalbergia       | AM  |
| <i>Daphne bholua</i>                | Thymelaeaceae    | Daphne          | AM  |
| <i>Daphniphyllum</i> sp.            | Daphniphyllaceae | Daphniphyllum   | AM  |
| <i>Daphniphyllum oldhami</i>        | Daphniphyllaceae | Daphniphyllum   | AM  |
| <i>Dendropanax dentiger</i>         | Araliaceae       | Dendropanax     | AM  |
| <i>Diospyros</i> sp.                | Ebenaceae        | Diospyros       | AM  |
| <i>Diospyros eriantha</i>           | Ebenaceae        | Diospyros       | AM  |
| <i>Diospyros morrisiana</i>         | Ebenaceae        | Diospyros       | AM  |
| <i>Elaeagnus pungens</i>            | Elaeagnaceae     | Elaeagnus       | EcM |
| <i>Elaeocarpus chinensis</i>        | Elaeocarpaceae   | Elaeocarpus     | AM  |
| <i>Elaeocarpus glabripetalus</i>    | Elaeocarpaceae   | Elaeocarpus     | AM  |
| <i>Eleutherococcus</i> sp.          | Araliaceae       | Eleutherococcus | AM  |
| <i>Emmenopterys henryi</i>          | Rubiaceae        | Emmenopterys    | AM  |
| <i>Engelhardia fenzelii</i>         | Juglandaceae     | Engelhardia     | EcM |
| <i>Enkianthus chinensis</i>         | Ericaceae        | Enkianthus      | AM  |
| <i>Enkianthus quinqueflorus</i>     | Ericaceae        | Enkianthus      | AM  |
| <i>Erythroxylum kunthianum</i>      | Erythroxylaceae  | Erythroxylum    | AM  |
| <i>Euonymus alatus</i>              | Celastraceae     | Euonymus        | AM  |
| <i>Euonymus clivicola</i>           | Celastraceae     | Euonymus        | AM  |
| <i>Eurya hebeclados</i>             | Theaceae         | Eurya           | AM  |
| <i>Eurya japonica</i>               | Theaceae         | Eurya           | AM  |
| <i>Eurya loquiana</i>               | Theaceae         | Eurya           | AM  |
| <i>Eurya metcalfiana</i>            | Theaceae         | Eurya           | AM  |
| <i>Eurya muricata</i>               | Theaceae         | Eurya           | AM  |
| <i>Eurya rubiginosa</i>             | Theaceae         | Eurya           | AM  |
| <i>Fagus longipetiolata</i>         | Fagaceae         | Fagus           | EcM |
| <i>Fraxinus retusa</i>              | Oleaceae         | Fraxinus        | AM  |
| <i>Halesia macgregorii</i>          | Styracaceae      | Halesia         | AM  |
| <i>Hydrangea macrophylla</i>        | Saxifragaceae    | Hydrangea       | AM  |
| <i>Hydrangea paniculata</i>         | Saxifragaceae    | Hydrangea       | AM  |
| <i>Ilex</i> sp.                     | Aquifoliaceae    | Ilex            | AM  |
| <i>Ilex</i> sp1                     | Aquifoliaceae    | Ilex            | AM  |
| <i>Ilex asprella</i>                | Aquifoliaceae    | Ilex            | AM  |
| <i>Ilex chinensis</i>               | Aquifoliaceae    | Ilex            | AM  |
| <i>Ilex delavayi</i>                | Aquifoliaceae    | Ilex            | AM  |
| <i>Ilex editicostata</i>            | Aquifoliaceae    | Ilex            | AM  |
| <i>Ilex ficoidea</i>                | Aquifoliaceae    | Ilex            | AM  |
| <i>Ilex formosana</i>               | Aquifoliaceae    | Ilex            | AM  |
| <i>Ilex latifolia</i>               | Aquifoliaceae    | Ilex            | AM  |
| <i>Ilex litseifolia</i>             | Aquifoliaceae    | Ilex            | AM  |

|                                  |                |              |     |
|----------------------------------|----------------|--------------|-----|
| <i>Ilex memecylifolia</i>        | Aquifoliaceae  | Ilex         | AM  |
| <i>Ilex pedunculosa</i>          | Aquifoliaceae  | Ilex         | AM  |
| <i>Ilex rotunda</i>              | Aquifoliaceae  | Ilex         | AM  |
| <i>Ilex</i> sp2                  | Aquifoliaceae  | Ilex         | AM  |
| <i>Ilex wilsonii</i>             | Aquifoliaceae  | Ilex         | AM  |
| <i>Illicium</i> sp.              | Illiciaceae    | Illicium     | AM  |
| <i>Illicium simonsii</i>         | Illiciaceae    | Illicium     | AM  |
| <i>Itea chinensis</i>            | Saxifragaceae  | Itea         | AM  |
| <i>Koelreuteria paniculata</i>   | Sapindaceae    | Koelreuteria | AM  |
| <i>Lindera</i> sp.               | Lauraceae      | Lindera      | AM  |
| <i>Lindera angustifolia</i>      | Lauraceae      | Lindera      | AM  |
| <i>Lindera erythrocarpa</i>      | Lauraceae      | Lindera      | AM  |
| <i>Lindera metcalfiana</i>       | Lauraceae      | Lindera      | AM  |
| <i>Lindera obtusiloba</i>        | Lauraceae      | Lindera      | AM  |
| <i>Liquidambar formosana</i>     | Hamamelidaceae | Liquidambar  | EcM |
| <i>Lithocarpus brevicaudatus</i> | Fagaceae       | Lithocarpus  | EcM |
| <i>Lithocarpus cleistocarpus</i> | Fagaceae       | Lithocarpus  | EcM |
| <i>Lithocarpus craibianus</i>    | Fagaceae       | Lithocarpus  | EcM |
| <i>Lithocarpus hancei</i>        | Fagaceae       | Lithocarpus  | EcM |
| <i>Lithocarpus hancei</i>        | Fagaceae       | Lithocarpus  | EcM |
| <i>Lithocarpus henryi</i>        | Fagaceae       | Lithocarpus  | EcM |
| <i>Lithocarpus hypoglaucus</i>   | Fagaceae       | Lithocarpus  | EcM |
| <i>Lithocarpus litseifolius</i>  | Fagaceae       | Lithocarpus  | EcM |
| <i>Lithocarpus variolosus</i>    | Fagaceae       | Lithocarpus  | EcM |
| <i>Litsea cubeba</i>             | Lauraceae      | Litsea       | AM  |
| <i>Litsea elongata</i>           | Lauraceae      | Litsea       | AM  |
| <i>Litsea pungens</i>            | Lauraceae      | Litsea       | AM  |
| <i>Lonicera hispida</i>          | Caprifoliaceae | Lonicera     | AM  |
| <i>Lonicera japonica</i>         | Caprifoliaceae | Lonicera     | AM  |
| <i>Lonicera webbiana</i>         | Caprifoliaceae | Lonicera     | AM  |
| <i>Loropetalum chinense</i>      | Hamamelidaceae | Loropetalum  | AM  |
| <i>Lyonia ovalifolia</i>         | Ericaceae      | Lyonia       | ErM |
| <i>Machilus</i> sp.              | Lauraceae      | Machilus     | AM  |
| <i>Machilus grijsii</i>          | Lauraceae      | Machilus     | AM  |
| <i>Machilus pauhoi</i>           | Lauraceae      | Machilus     | AM  |
| <i>Machilus phoenicis</i>        | Lauraceae      | Machilus     | AM  |
| <i>Machilus thunbergii</i>       | Lauraceae      | Machilus     | AM  |
| <i>Maddenia hypoleuca</i>        | Rosaceae       | Maddenia     | AM  |
| <i>Mahonia</i> sp.               | Berberidaceae  | Mahonia      | AM  |
| <i>Mahonia fortunei</i>          | Berberidaceae  | Mahonia      | AM  |
| <i>Malus</i> sp.                 | Rosaceae       | Malus        | AM  |
| <i>Malus hupehensis</i>          | Rosaceae       | Malus        | AM  |
| <i>Malus spectabilis</i>         | Rosaceae       | Malus        | AM  |
| <i>Manglietia fordiana</i>       | Magnoliaceae   | Manglietia   | AM  |

|                               |               |               |        |
|-------------------------------|---------------|---------------|--------|
| <i>Meliosma cuneifolia</i>    | Sabiaceae     | Meliosma      | AM     |
| <i>Meliosma squamulata</i>    | Sabiaceae     | Meliosma      | AM     |
| <i>Meliosma rhoifolia</i>     | Sabiaceae     | Meliosma      | AM     |
| <i>Meliosma yunnanensis</i>   | Sabiaceae     | Meliosma      | AM     |
| <i>Metapanax delavayi</i>     | Araliaceae    | Metapanax     | AM     |
| <i>Michelia maudiae</i>       | Magnoliaceae  | Michelia      | AM     |
| <i>Myrica rubra</i>           | Myricaceae    | Myrica        | AM     |
| <i>Myrsine africana</i>       | Myrsinaceae   | Myrsine       | AM     |
| <i>Neolitsea aurata</i>       | Lauraceae     | Neolitsea     | AM     |
| <i>Padus obtusata</i>         | Rosaceae      | Padus         | AM     |
| <i>Padus racemosa</i>         | Rosaceae      | Padus         | AM     |
| <i>Philadelphus</i> sp.       | Saxifragaceae | Philadelphus  | AM     |
| <i>Philadelphus incanus</i>   | Saxifragaceae | Philadelphus  | AM     |
| <i>Phoebe bournei</i>         | Lauraceae     | Phoebe        | AM     |
| <i>Photinia</i> sp.           | Rosaceae      | Photinia      | AM     |
| <i>Photinia</i> sp1           | Rosaceae      | Photinia      | AM     |
| <i>Photinia beauverdiana</i>  | Rosaceae      | Photinia      | AM     |
| <i>Photinia parvifolia</i>    | Rosaceae      | Photinia      | AM     |
| <i>Photinia serrulata</i>     | Rosaceae      | Photinia      | AM-EcM |
| <i>Phyllostachys edulis</i>   | Poaceae       | Phyllostachys | AM     |
| <i>Picea brachytyla</i>       | Pinaceae      | Picea         | EcM    |
| <i>Pieris japonica</i>        | Ericaceae     | Pieris        | ErM    |
| <i>Pinus armandii</i>         | Pinaceae      | Pinus         | EcM    |
| <i>Pinus massoniana</i>       | Pinaceae      | Pinus         | EcM    |
| <i>Pinus tabulaeformis</i>    | Pinaceae      | Pinus         | EcM    |
| <i>Pinus taiwanensis</i>      | Pinaceae      | Pinus         | EcM    |
| <i>Pinus yunnanensis</i>      | Pinaceae      | Pinus         | EcM    |
| <i>Pistacia chinensis</i>     | Anacardiaceae | Pistacia      | AM     |
| <i>Populus purdomii</i>       | Salicaceae    | Populus       | AM     |
| <i>Populus rotundifolia</i>   | Salicaceae    | Populus       | AM-EcM |
| <i>Pyrus calleryana</i>       | Rosaceae      | Pyrus         | AM     |
| <i>Pyrus serrulata</i>        | Rosaceae      | Pyrus         | AM     |
| <i>Quercus</i> sp.            | Fagaceae      | Quercus       | EcM    |
| <i>Quercus</i> sp1            | Fagaceae      | Quercus       | EcM    |
| <i>Quercus aliena</i>         | Fagaceae      | Quercus       | EcM    |
| <i>Quercus griffithii</i>     | Fagaceae      | Quercus       | EcM    |
| <i>Quercus phillyraeoides</i> | Fagaceae      | Quercus       | EcM    |
| <i>Quercus serrata</i>        | Fagaceae      | Quercus       | EcM    |
| <i>Quercus spinosa</i>        | Fagaceae      | Quercus       | EcM    |
| <i>Reevesia pubescens</i>     | Sterculiaceae | Reevesia      | AM     |
| <i>Rhamnus crenata</i>        | Rhamnaceae    | Rhamnus       | AM     |
| <i>Rhododendron</i> sp.       | Ericaceae     | Rhododendron  | ErM    |
| <i>Rhododendron</i> sp1       | Ericaceae     | Rhododendron  | ErM    |
| <i>Rhododendron</i> sp2       | Ericaceae     | Rhododendron  | ErM    |

|                                   |                |              |        |
|-----------------------------------|----------------|--------------|--------|
| <i>Rhododendron</i> sp3           | Ericaceae      | Rhododendron | ErM    |
| <i>Rhododendron</i> sp4           | Ericaceae      | Rhododendron | ErM    |
| <i>Rhododendron ambiguum</i>      | Ericaceae      | Rhododendron | ErM    |
| <i>Rhododendron anthosphaerum</i> | Ericaceae      | Rhododendron | ErM    |
| <i>Rhododendron argyrophyllum</i> | Ericaceae      | Rhododendron | ErM    |
| <i>Rhododendron calophytum</i>    | Ericaceae      | Rhododendron | ErM    |
| <i>Rhododendron decorum</i>       | Ericaceae      | Rhododendron | ErM    |
| <i>Rhododendron delavayi</i>      | Ericaceae      | Rhododendron | ErM    |
| <i>Rhododendron farrerae</i>      | Ericaceae      | Rhododendron | ErM    |
| <i>Rhododendron fortunei</i>      | Ericaceae      | Rhododendron | ErM    |
| <i>Rhododendron irroratum</i>     | Ericaceae      | Rhododendron | ErM    |
| <i>Rhododendron latoucheae</i>    | Ericaceae      | Rhododendron | ErM    |
| <i>Rhododendron mariesii</i>      | Ericaceae      | Rhododendron | ErM    |
| <i>Rhododendron neriiflorum</i>   | Ericaceae      | Rhododendron | ErM    |
| <i>Rhododendron ovatum</i>        | Ericaceae      | Rhododendron | ErM    |
| <i>Rhododendron pachytrichum</i>  | Ericaceae      | Rhododendron | ErM    |
| <i>Rhododendron parvifolium</i>   | Ericaceae      | Rhododendron | ErM    |
| <i>Rhododendron prattii</i>       | Ericaceae      | Rhododendron | ErM    |
| <i>Rhododendron przewalskii</i>   | Ericaceae      | Rhododendron | ErM    |
| <i>Rhododendron rigidum</i>       | Ericaceae      | Rhododendron | ErM    |
| <i>Rhododendron simiarum</i>      | Ericaceae      | Rhododendron | ErM    |
| <i>Rhododendron simsii</i>        | Ericaceae      | Rhododendron | ErM    |
| <i>Rhododendron sinogrande</i>    | Ericaceae      | Rhododendron | ErM    |
| <i>Rhododendron watsonii</i>      | Ericaceae      | Rhododendron | ErM    |
| <i>Rhododendron yunnanense</i>    | Ericaceae      | Rhododendron | ErM    |
| <i>Ribes davidii</i>              | Saxifragaceae  | Ribes        | AM     |
| <i>Ribes tenue</i>                | Saxifragaceae  | Ribes        | AM     |
| <i>Salix</i> sp.                  | Salicaceae     | Salix        | AM-EcM |
| <i>Salix</i> sp1                  | Salicaceae     | Salix        | AM-EcM |
| <i>Salix resecta</i>              | Salicaceae     | Salix        | AM-EcM |
| <i>Schima argentea</i>            | Theaceae       | Schima       | AM     |
| <i>Schima superba</i>             | Theaceae       | Schima       | AM     |
| <i>Sloanea sinensis</i>           | Elaeocarpaceae | Sloanea      | AM     |
| <i>Sorbus</i> sp.                 | Rosaceae       | Sorbus       | AM     |
| <i>Sorbus prattii</i>             | Rosaceae       | Sorbus       | AM     |
| <i>Sorbus rehderiana</i>          | Rosaceae       | Sorbus       | AM     |
| <i>Sorbus</i> sp1                 | Rosaceae       | Sorbus       | AM     |
| <i>Sorbus thibetica</i>           | Rosaceae       | Sorbus       | AM     |
| <i>Spiraea cantoniensis</i>       | Rosaceae       | Spiraea      | AM     |
| <i>Stewartia sinensis</i>         | Theaceae       | Stewartia    | AM     |
| <i>Stranvaesia davidiana</i>      | Rosaceae       | Stranvaesia  | AM     |
| <i>Styrax</i> sp.                 | Styracaceae    | Styrax       | AM     |
| <i>Symplocos</i> sp.              | Symplocaceae   | Symplocos    | AM     |
| <i>Symplocos</i> sp1              | Symplocaceae   | Symplocos    | AM     |

|                                   |                |               |        |
|-----------------------------------|----------------|---------------|--------|
| <i>Symplocos anomala</i>          | Symplocaceae   | Symplocos     | AM     |
| <i>Symplocos congesta</i>         | Symplocaceae   | Symplocos     | AM     |
| <i>Symplocos glauca</i>           | Symplocaceae   | Symplocos     | AM     |
| <i>Symplocos lancifolia</i>       | Symplocaceae   | Symplocos     | AM     |
| <i>Symplocos paniculata</i>       | Symplocaceae   | Symplocos     | AM     |
| <i>Symplocos stellaris</i>        | Symplocaceae   | Symplocos     | AM     |
| <i>Symplocos sumuntia</i>         | Symplocaceae   | Symplocos     | AM     |
| <i>Syzygium austrosinense</i>     | Myrtaceae      | Syzygium      | AM     |
| <i>Syzygium buxifolium</i>        | Myrtaceae      | Syzygium      | AM     |
| <i>Ternstroemia</i> sp.           | Theaceae       | Ternstroemia  | EcM    |
| <i>Ternstroemia gymnanthera</i>   | Theaceae       | Ternstroemia  | EcM    |
| <i>Tetracentron sinense</i>       | Magnoliaceae   | Tetracentron  | AM     |
| <i>Toxicodendron trichocarpum</i> | Anacardiaceae  | Toxicodendron | AM     |
| <i>Toxicodendron vernicifluum</i> | Anacardiaceae  | Toxicodendron | AM     |
| <i>Tsuga chinensis</i>            | Pinaceae       | Tsuga         | EcM    |
| <i>Tsuga dumosa</i>               | Pinaceae       | Tsuga         | EcM    |
| <i>Ulmus</i> sp.                  | Ulmaceae       | Ulmus         | AM-EcM |
| <i>Vaccinium bracteatum</i>       | Ericaceae      | Vaccinium     | ErM    |
| <i>Vaccinium carlesii</i>         | Ericaceae      | Vaccinium     | ErM    |
| <i>Vaccinium trichocladum</i>     | Ericaceae      | Vaccinium     | ErM    |
| <i>Vaccinium vitis-idaea</i>      | Ericaceae      | Vaccinium     | ErM    |
| <i>Viburnum</i> sp.               | Caprifoliaceae | Viburnum      | AM     |
| <i>Viburnum</i> sp1               | Caprifoliaceae | Viburnum      | AM     |
| <i>Viburnum corymbiflorum</i>     | Caprifoliaceae | Viburnum      | AM     |
| <i>Viburnum cylindricum</i>       | Caprifoliaceae | Viburnum      | AM     |
| <i>Viburnum dilatatum</i>         | Caprifoliaceae | Viburnum      | AM     |
| <i>Viburnum nervosum</i>          | Caprifoliaceae | Viburnum      | AM     |
| <i>Yulania</i> sp.                | Magnoliaceae   | Yulania       | AM     |
| <i>Yulania denudata</i>           | Magnoliaceae   | Yulania       | AM     |

Note: *Acer* sp., *Acer* sp1 indicate different unidentified species in the genus *Acer*. Those unidentified species in other genera are similarly expressed. The mycorrhizal types were assigned based on the FungalRoot database (Soudzilovskaia et al., 2019) and public literatures.

### Primary references

- Harley, J. L., & Harley, E. L. (1987). A check-list of mycorrhiza in the British flora. *The New Phytologist*, 105(2), 1-102.
- Haug, I., Weber, R., Oberwinkler, F., & Tschen, J. (1994). The mycorrhizal status of Taiwanese trees and the description of some ectomycorrhizal types. *Trees*, 8, 237-253.
- Soudzilovskaia, N. A., van Bodegom, P. M., Terrer, C., Zelfde, M. V. T., McCallum, I., Luke McCormack, M., ... & Tedersoo, L. (2019). Global mycorrhizal plant distribution linked to terrestrial carbon stocks. *Nature communications*, 10(1), 5077.
